# Supplementary material for: CuGaO2: a promising alternative for NiO in p-type dye solar cells
Source: Royal Society of Chemistry journal article supplement (doi:10.1039/c2jm31908j), 2012-01-01
Supplement: c2jm31908j.pdf [file c2jm31908j.pdf]

# CuGaO<sub>2</sub> a promising alternative for NiO in p-type dye solar cells

Adèle Renaud<sup>a</sup>, Benoit Chavillon<sup>a</sup>, Loïc Lepleux<sup>b</sup>, Yann Pellegrin<sup>b</sup>, Errol Blart<sup>b</sup>, Mohammed Boujtita<sup>b</sup>, Thierry Pauporté<sup>c</sup>, Laurent Cario<sup>a</sup>, Stéphane Jobic<sup>a</sup>, Fabrice Odobel<sup>b</sup>

<sup>a</sup> Institut des Matériaux Jean Rouxel, Université de Nantes, CNRS, 44322 Nantes cedex 03, France

<sup>b</sup> CEISAM, Université de Nantes, CNRS, 44322 Nantes cedex 03, France

<sup>c</sup> Laboratoire d'Electrochimie, chimie des interfaces et modélisation pour l'énergie, UMR 7575, Chimie-ParisTech., 75231 Paris cedex 05, France

E-mail: stephane.jobic@cnsr-immn.fr, laurent.cario@cnsr-immn.fr

E-mail : Fabrice.Odobel@univ-nantes.fr

## Experimental details

### *Electrochemical impedance spectroscopy (EIS) measurements.*

Pellets for electrochemical impedance spectroscopy (EIS) measurements were formed from CuGaO<sub>2</sub> nanoparticles pressed under 100 bars and sintered at 450°C for 3 hours in nitrogen atmosphere. The back side was painted with a silver glue and contacted with copper coil before being mounted in a polypropylene tube using chemically resistant epoxy. EIS measurements were carried out with a potentiostat/galvanostat model VSP from Biologic Sciences Instruments on polished samples (used SiC-Paper, grit 1200 and 4000 (Struers)) in an electrolyte composed of 1 M LiClO<sub>4</sub> in water (pH ~ 6.3) with a platinum counter-electrode and a saturated calomel reference electrode (SCE).

*Preparation of the CuGaO<sub>2</sub> photocathode.*

The doctor Blade paste is composed of CuGaO<sub>2</sub> nanoparticles ball milled in an adapted mixture of organic ingredients to have a suitable rheology to homogeneously spread CuGaO<sub>2</sub> on FTO (Solems 10 Ohm TEC7) (see table S1).

**Table S1.** Detailed composition of the paste for doctor blading.

|                          | Component                   | Quantity |
|--------------------------|-----------------------------|----------|
| <b>Semiconductor</b>     | CuGaO <sub>2</sub>          | 100 mg   |
| <b>Binder</b>            | PEG 300 (Aldrich)           | 20.5 mg  |
| <b>Rheological agent</b> | Ethylcellulose (Aldrich)    | 4 mg     |
| <b>Acidifying agent</b>  | 4-hydrobenzoic acid (Merck) | 2 mg     |
| <b>Solvent</b>           | 2-ethyl-1-hexanol (Aldrich) | 750 μL   |

The as-obtained electrodes were then dipped at room temperature for 48 hours into an acetonitrile solution, containing either perylene monoimide (PMI) or perylene monoimide sensitizer connected to a naphthalene diimine electron acceptor (dyad PMI-NDI). The dyed electrodes were thoroughly rinsed with acetonitrile.

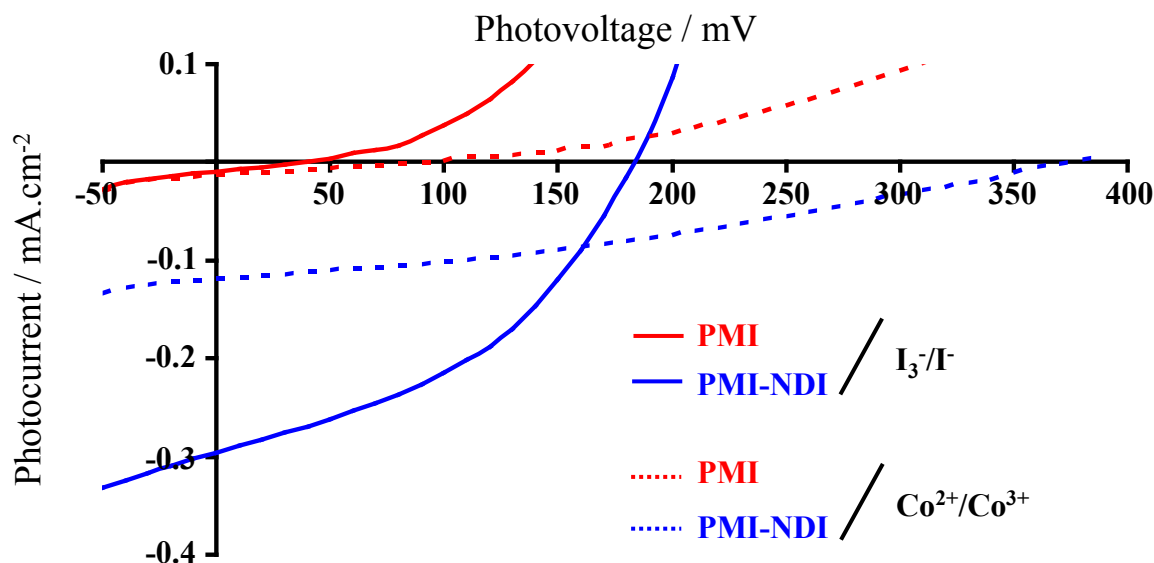

**Fig. S1.** Photoresponse under AM1.5 illumination (1000 W/m<sup>2</sup>) of solar cells constructed from CuGaO<sub>2</sub> p-SC with dyad PMI-NDI or PMI as sensitizer, and I<sub>3</sub><sup>-</sup>/I<sup>-</sup> or Co<sup>2+</sup>/Co<sup>3+</sup> in PC as redox mediator.
